# Supplementary material for: Claudin-3 inhibits tumor-induced lymphangiogenesis via regulating the PI3K signaling pathway in lymphatic endothelial cells
Source: PubMed Central journal article supplement (PMC9581975; doi:10.1038/s41598-022-22156-6), 2022-10-19
Supplement: 41598_2022_22156_MOESM1_ESM.pdf [file 41598_2022_22156_MOESM1_ESM.pdf]

## Supplementary Material

### **Claudin-3 inhibits tumor-induced lymphangiogenesis via regulating the PI3K signaling pathway in lymphatic endothelial cells**

Ningjing Lei<sup>1,2</sup>, Yanru Cheng<sup>1</sup>, Jiajia Wan<sup>1</sup>, Rosel Blasig<sup>3</sup>, Anqi Li<sup>1</sup>, Yueyue Bai<sup>1,2</sup>, Reiner F Haseloff<sup>3</sup>, Ingolf E Blasig<sup>3</sup>, Linyu Zhu<sup>1\*</sup>, Zhihai Qin<sup>1\*</sup>

<sup>1</sup> Medical Research Center, The First Affiliated Hospital of Zhengzhou University, Zhengzhou University, No. 1 Jianshe Road, Zhengzhou 450001, China

<sup>2</sup> School of Basic Medical Sciences, Zhengzhou University, No. 100 Kexue Road, Zhengzhou 450001, China

<sup>3</sup> Leibniz-Forschungsinstitut für Molekulare Pharmakologie (FMP), Robert-Rössle-Straße 10, Berlin 13125, Germany

**\*Correspondence to:** Zhihai Qin ([zhihai@zzu.edu.cn](mailto:zhihai@zzu.edu.cn)) or Linyu Zhu ([zhulinyu1zzu@hotmail.com](mailto:zhulinyu1zzu@hotmail.com)), Medical Research Center, The First Affiliated Hospital of Zhengzhou University, Zhengzhou, Henan 450052, China.

Phone: +86-371-66913632; Fax: +86-371-66913632.

## Supplementary Figures

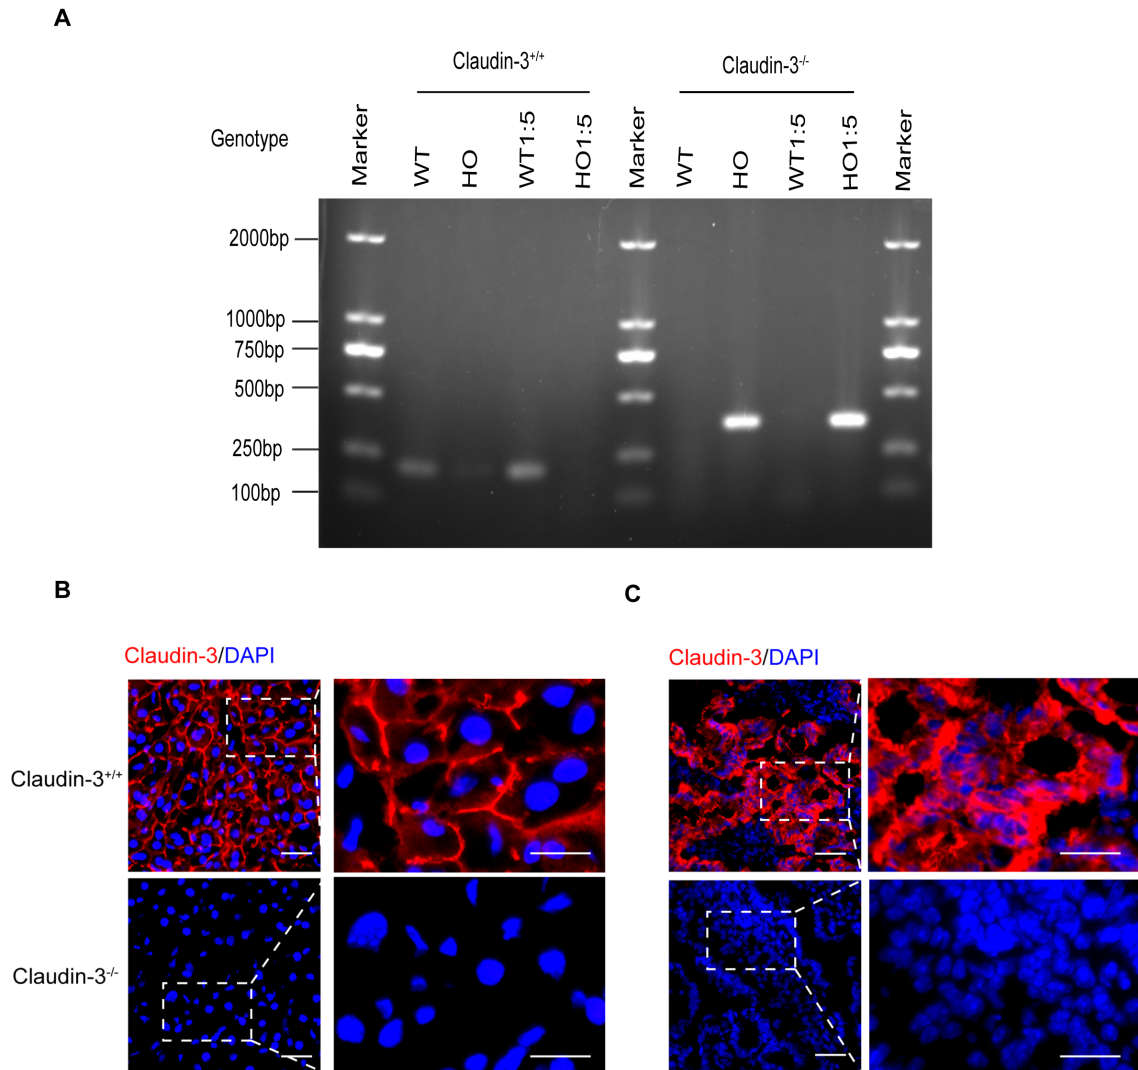

**Supplementary Figure 1. Identification of homozygous claudin-3 knockout mice.** A. Mice's tails were cut and digested. DNA was extracted and was analyzed by gel electrophoresis. The identified genotypes can be determined based on the expression of gene fragments. claudin-3<sup>+/+</sup>: 225bp; claudin-3<sup>-/-</sup>: 275bp. HO: claudin-3<sup>-/-</sup> homozygous; WT: claudin-3<sup>+/+</sup>; 1:5 refer to the dilution ratio of DNA as 5x for PCR analysis. B. IF staining of claudin-3 protein by anti-claudin-3 antibody (Abcam CAT#: ab15102) in liver tissues of claudin-3<sup>+/+</sup> and claudin-3<sup>-/-</sup> mice. Scale bar: 200  $\mu$ m. C. IF staining of claudin-3 protein by anti-claudin-3 antibody (Abcam CAT#: ab15102) in ileum tissues of claudin-3<sup>+/+</sup> and claudin-3<sup>-/-</sup> mice. Scale bars: 200  $\mu$ m.

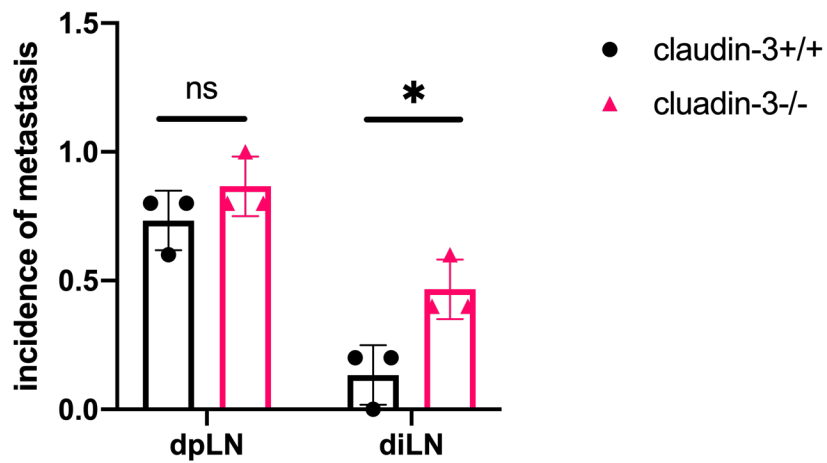

**Supplementary Figure 2. Incidence of metastasized mCherry-B16F10 cells into lymph nodes.** Metastasized mCherry labeled B16F10 cells into dpLNs and diLNs of claudin-3<sup>-/-</sup> and claudin-3<sup>+/+</sup> mice were analyzed on three independent experiments. dpLN: ipsilateral popliteal lymph node; diLN: ipsilateral inguinal lymph node. (ns: no significance; \*p < 0.05) (n=5 mice per group; incidence = number of metastasized mice/5)

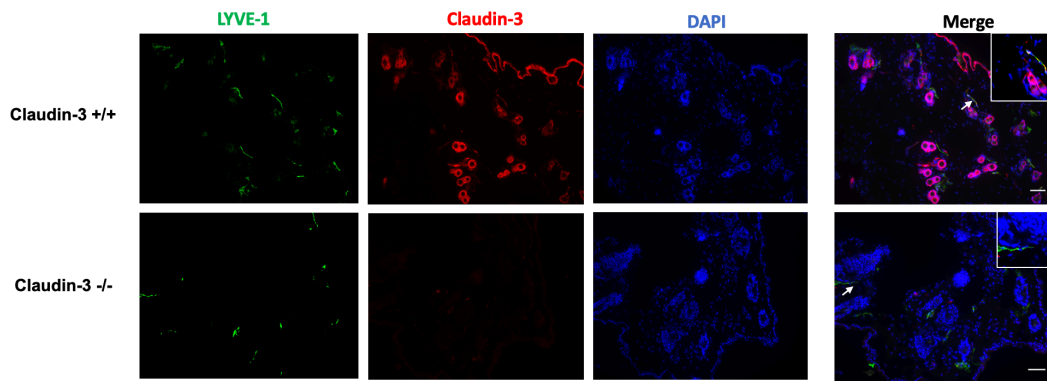

**Supplementary Figure 3. Expression of claudin-3 on skin lymphatic vessels.** Co-staining of skin tissue from C57BL/6 claudin3<sup>+/+</sup> and claudin3<sup>-/-</sup> mice with anti-LYVE-1 (Abcam CAT#: ab14917) and anti-claudin-3 (Abcam CAT#: ab15102). Scale bar, 500  $\mu$ m.



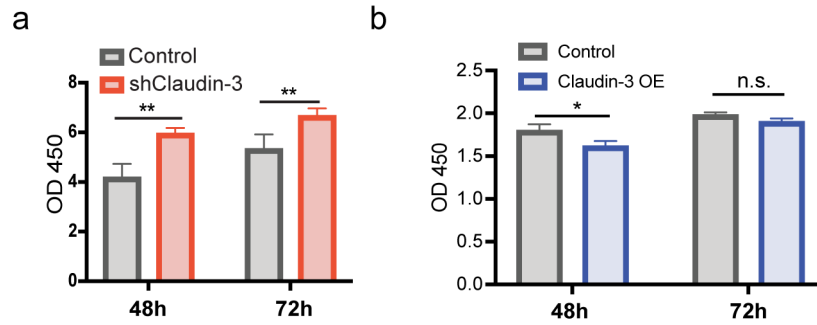

**Supplementary Figure 4. Transfection of claudin-3 in SVEC4-10 cells affects cell proliferation.** a. CCK-8 analysis detected the cell proliferation in SVEC4-10 control and shClaudin-3 cells at indicated time. b. CCK-8 analysis detected the cell proliferation in SVEC4-10 control and Claudin-3 overexpression cells (Claudin-3 OE) at indicated time. (ns: no significance; \* $p < 0.05$ , \*\* $p < 0.01$ ) (n=5 per group)

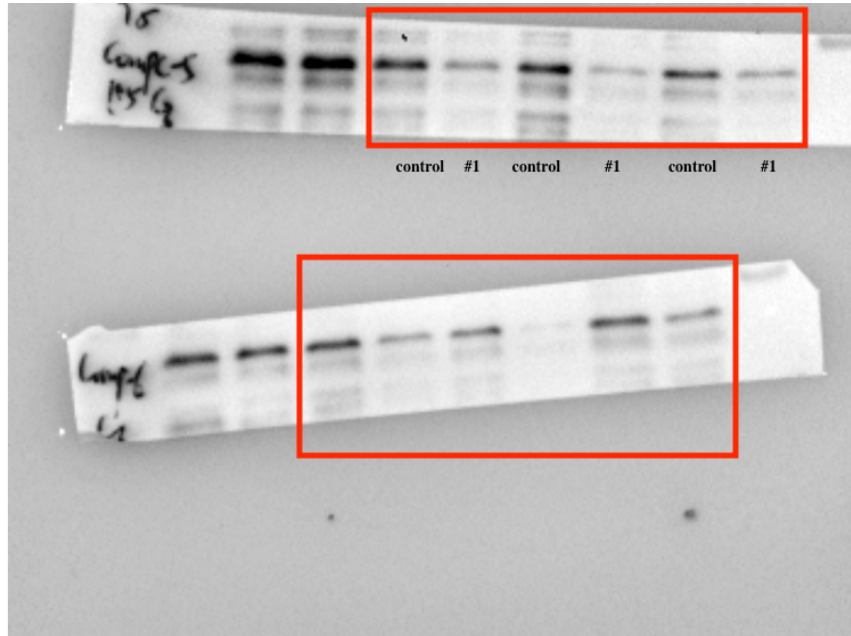

Original image of Fig 3b: claudin-3 control and knockdown; claudin-3 (20 kDa)

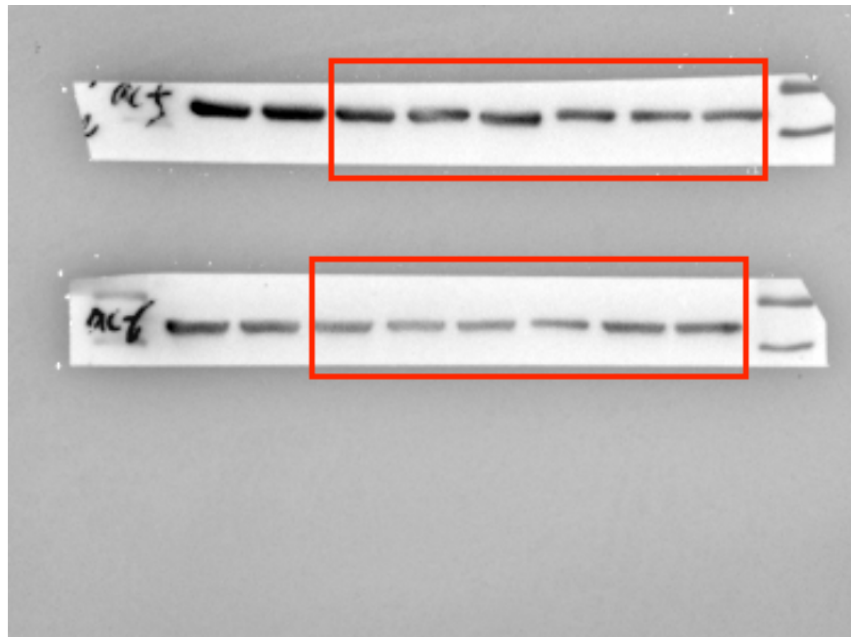

Original image of Fig 3b: actin (42 kDa)

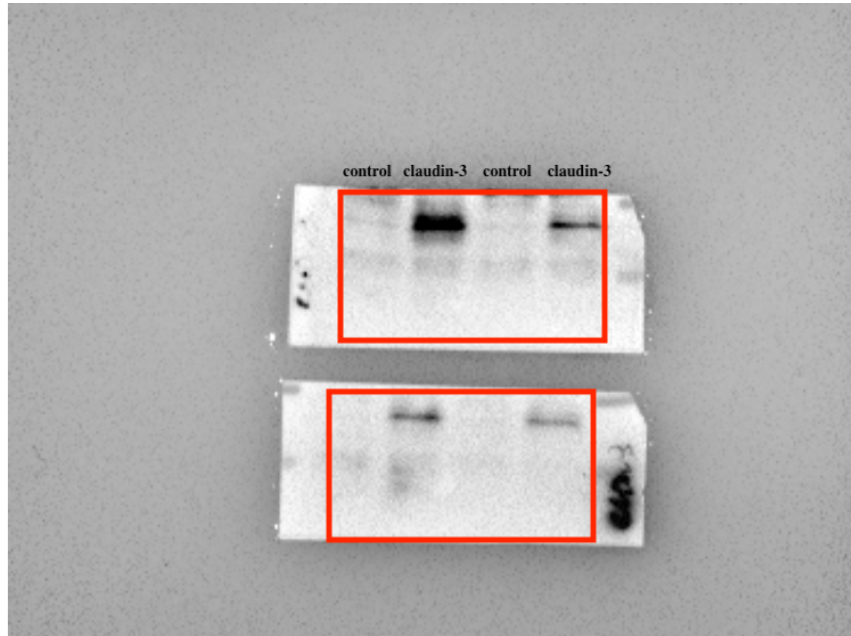

**Original image of Fig 4b: claudin-3 control and overexpression; claudin-3 (20 kDa)**

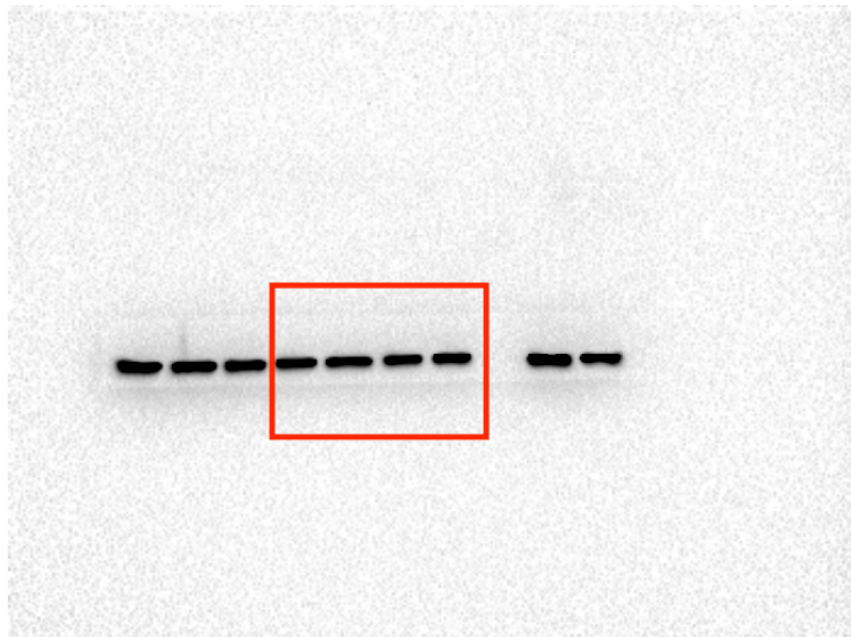

**Original image of Fig 4b: actin (42 kDa)**

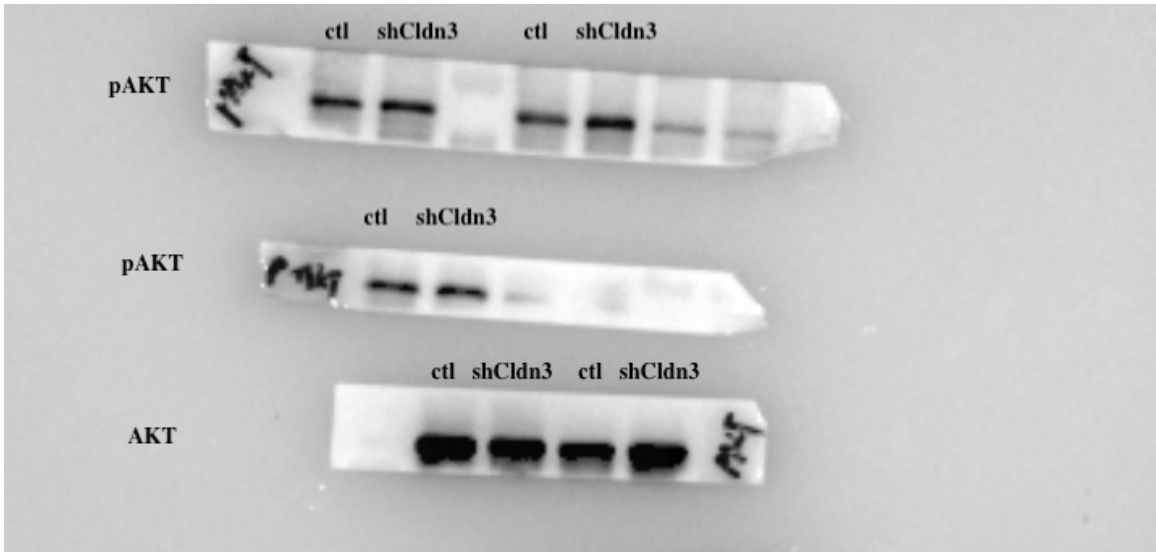

Original image of Fig 5a: phosphorylation of AKT (pAKT) and AKT (60 kDa)  
SVEC4-10 control (ctl) and claudin-3 knockdown (shCldn3) cells

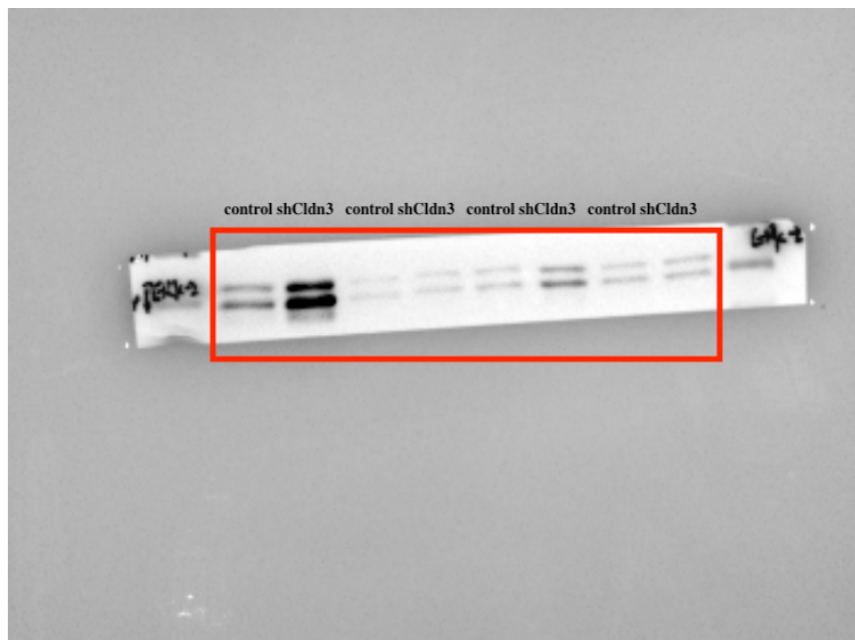

Original image of Fig 5a: phosphorylation of ERK (44, 42 kDa)  
SVEC4-10 control and claudin-3 knockdown cells

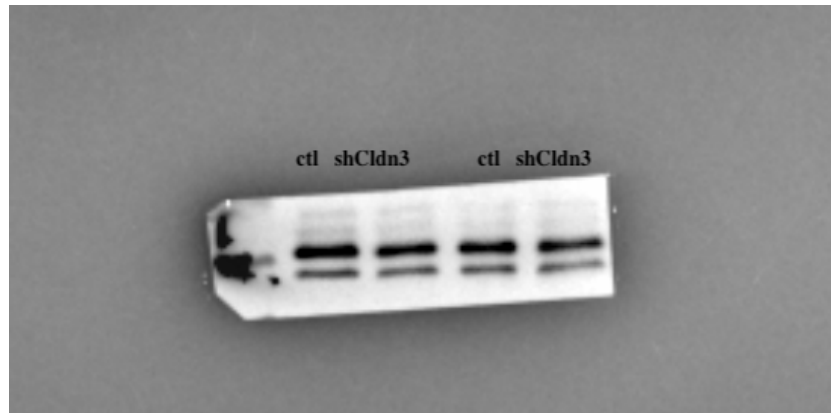

**Original image of Fig 5a: total ERK protein (44, 42 kDa)  
SVEC4-10 control and claudin-3 knockdown cells**

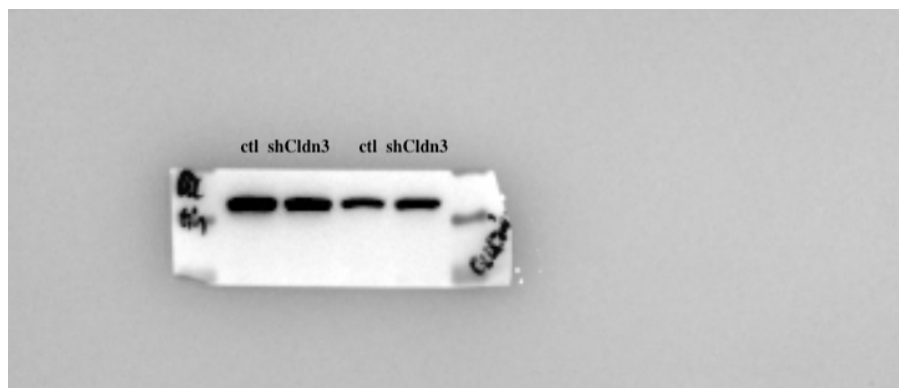

**Original image of Fig 5a: actin (42 kDa)  
SVEC4-10 control and claudin-3 knockdown cells**

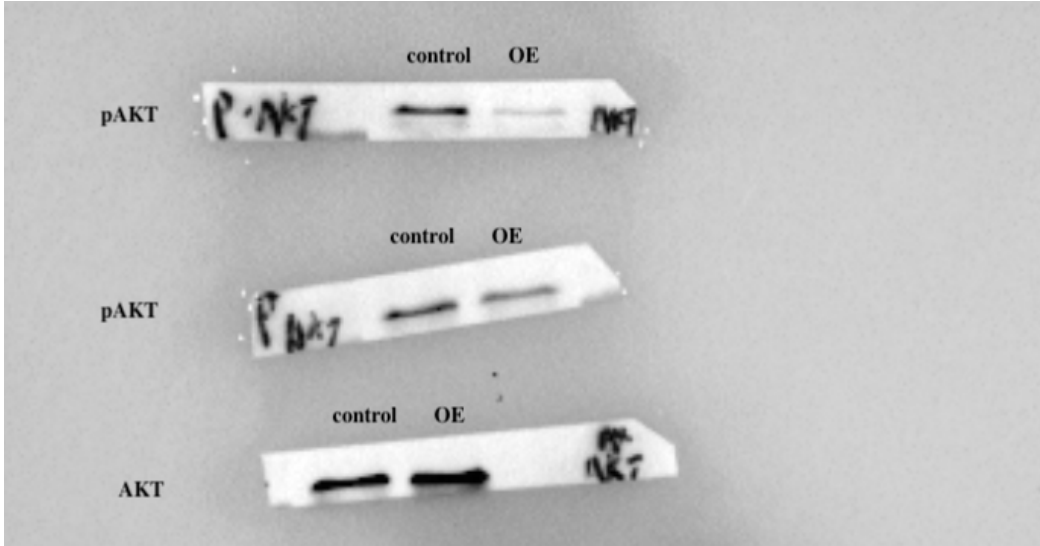

**Original image of Fig 5b: phosphorylation of AKT (pAKT) and AKT (60 kDa)  
SVEC4-10 control and claudin-3 overexpression (OE) cells**

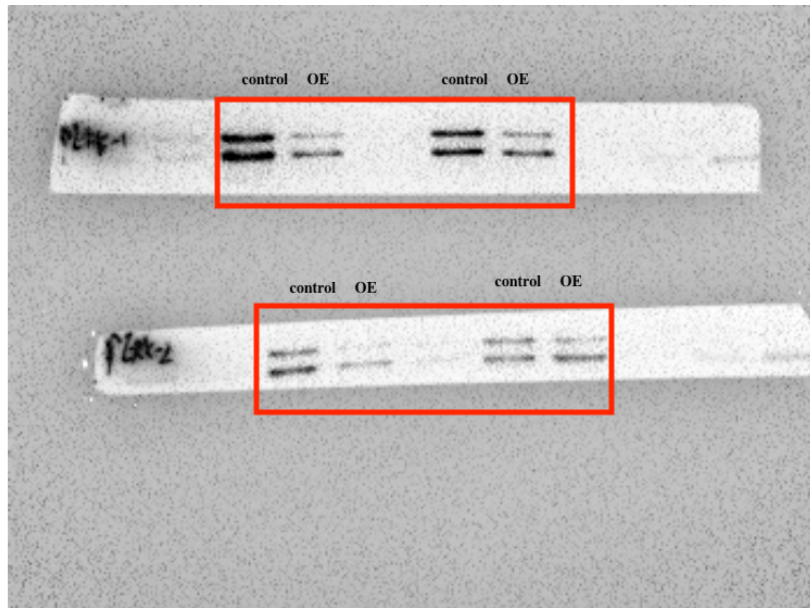

**Original image of Fig 5b: phosphorylation of ERK (44, 42 kDa)  
SVEC4-10 control and claudin-3 overexpression cells**

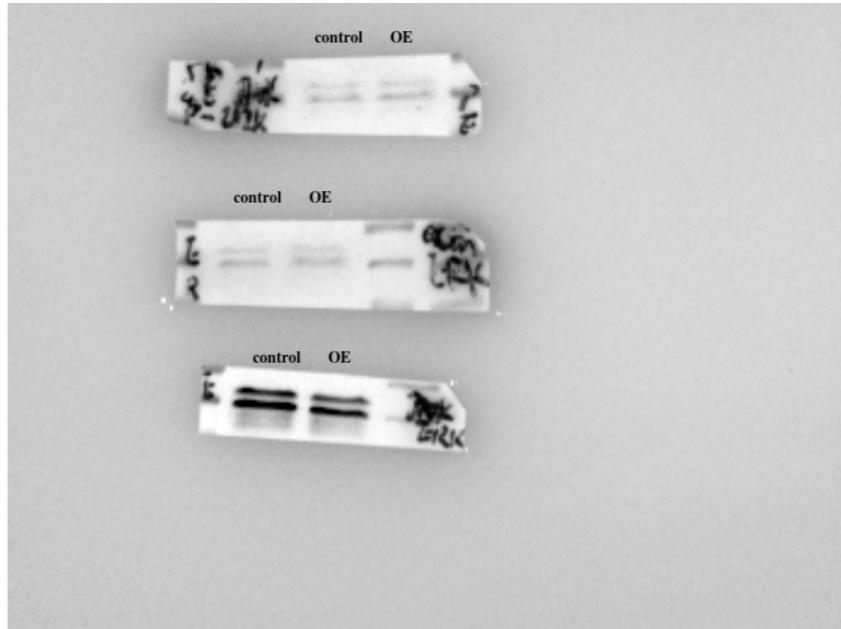

**Original image of Fig 5b: total ERK protein (44, 42 kDa)  
SVEC4-10 control and claudin-3 overexpression cells**

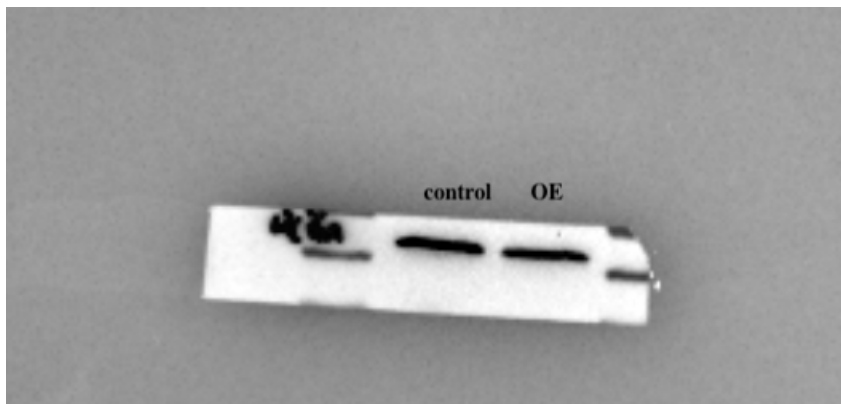

**Original image of Fig 5b: actin (42 kDa)  
SVEC4-10 control and claudin-3 overexpression cells**

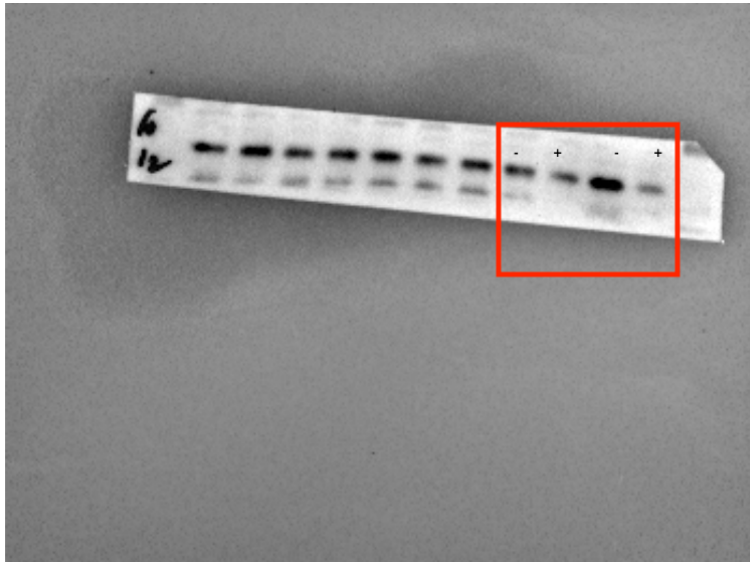

Original image of Fig 6b: claudin-3 (20 kDa)

SVEC4-10 co-cultured with conditional medium (CM) from B16F10 cells for 12h

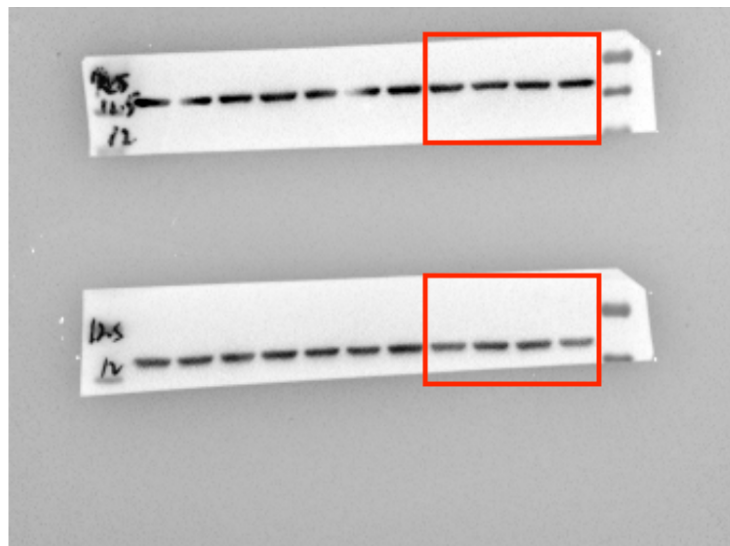

Original image of Fig 6b: actin (42 kDa)

SVEC4-10 co-cultured with conditional medium (CM) from B16F10 cells for 12h



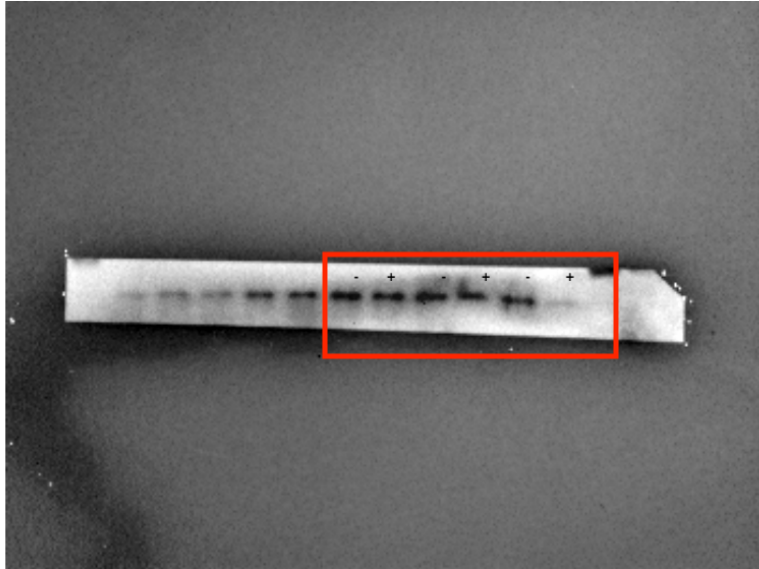

**Original image of Fig 6b: claudin-3 (20 kDa)**

**SVEC4-10 co-cultured with conditional medium (CM) from B16F10 cells for 24h.**

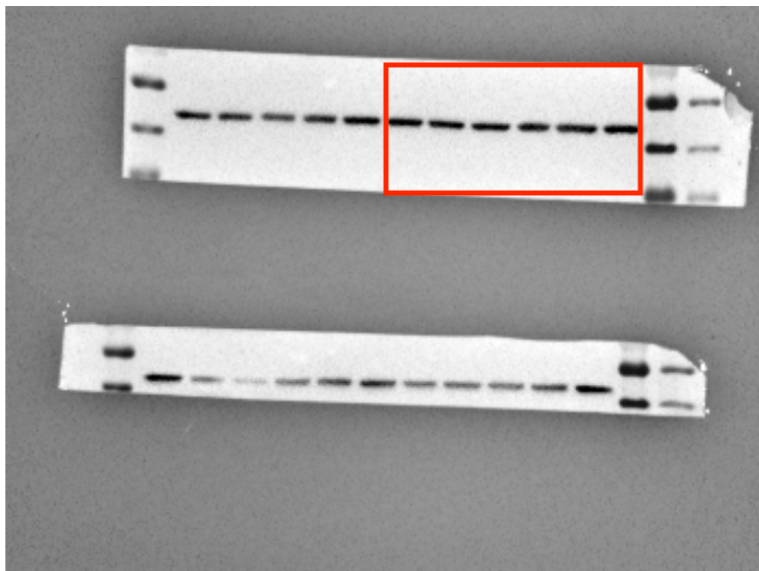

**Original image of Fig 6b: actin (42 kDa)**

**SVEC4-10 co-cultured with conditional medium (CM) from B16F10 cells for 24h.**

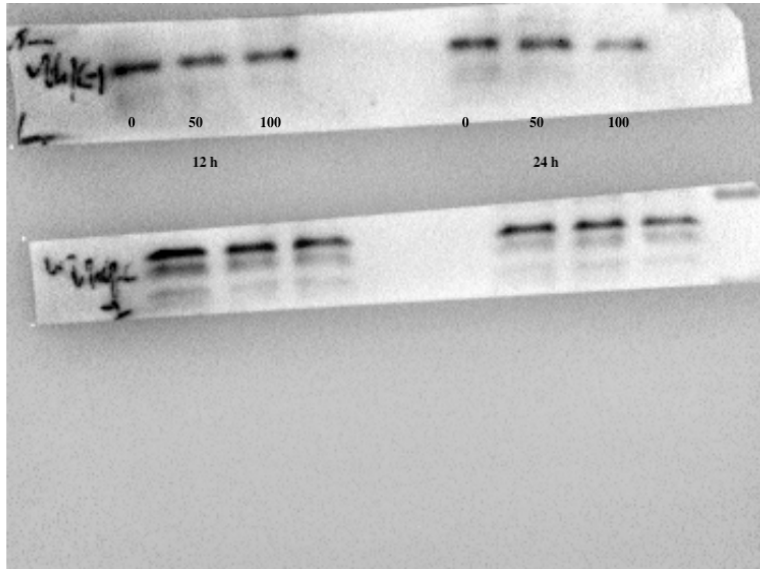

**Original image of Fig 6e: claudin-3 (20 kDa)**

**SVEC4-10 treated with 0 ng/mL, 50ng/mL or 100 ng/mL VEGF-C for 12h or 24h.**

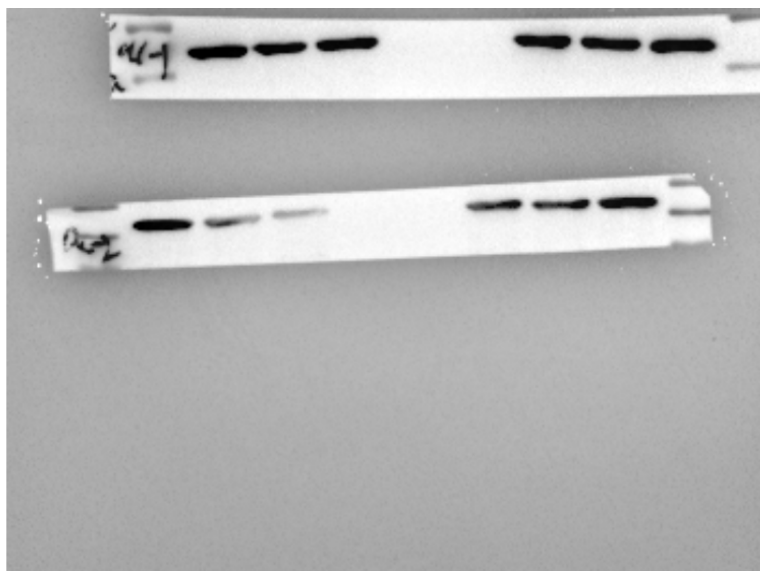

**Original image of Fig 6e: actin (42 kDa)**

**SVEC4-10 treated with 0 ng/mL, 50ng/mL or 100 ng/mL VEGF-C for 12h or 24h.**
